# Supplementary material for: A Selective Review and Virtual Screening Analysis of Natural Product Inhibitors of the NLRP3 Inflammasome
Source: MDPI journal article supplement (doi:10.3390/molecules27196213), 2022-09-21
Supplement: s1 [file s1]

# A selective Review and Virtual Screening Analysis of Natural Product Inhibitors of the NLRP3 Inflammasome

Sherihan El-Sayed <sup>1,2</sup>, Sally Freeman <sup>1,\*</sup> and Richard A. Bryce <sup>1</sup>

**Table S1.** Filter parameters used to filter ZINC20 natural products subset.

| Parameter                         | Minimum value | Maximum value |
|-----------------------------------|---------------|---------------|
| Molecular weight                  | 130           | 550           |
| Number of hydrogen-bond acceptors | 0             | 10            |
| Number of hydrogen-bond donors    | 0             | 5             |
| Number of oxygen & nitrogen atoms | 0             | 10            |
| Number O & N atoms with hydrogens | 0             | 5             |
| XLogP                             | 2             | 5.5           |

**Table S2.** Docking score of the best compounds that bind to the cofactor site (compounds 1-6) using the structure of the NACHT domain of NLRP3 (PDB code 7ALV)[35].

| Number | Zinc ID          | Chemguass4 score |
|--------|------------------|------------------|
| 1      | ZINC000604405316 | -17.5            |
| 2      | ZINC000253500112 | -17.2            |
| 3      | ZINC000253500236 | -17.1            |
| 4      | ZINC000253499536 | -17.3            |
| 5      | ZINC000253499916 | -16.0            |
| 6      | ZINC000049590453 | -16.7            |
